# Supplementary material for: Dissociable effects of dopaminergic medications on depression symptom dimensions in Parkinson’s disease
Source: bioRxiv or medRxiv preprint supplement (doi:10.1101/2023.06.30.23292073), 2023-06-30
Supplement: Supplementary file [file media-1.pdf]

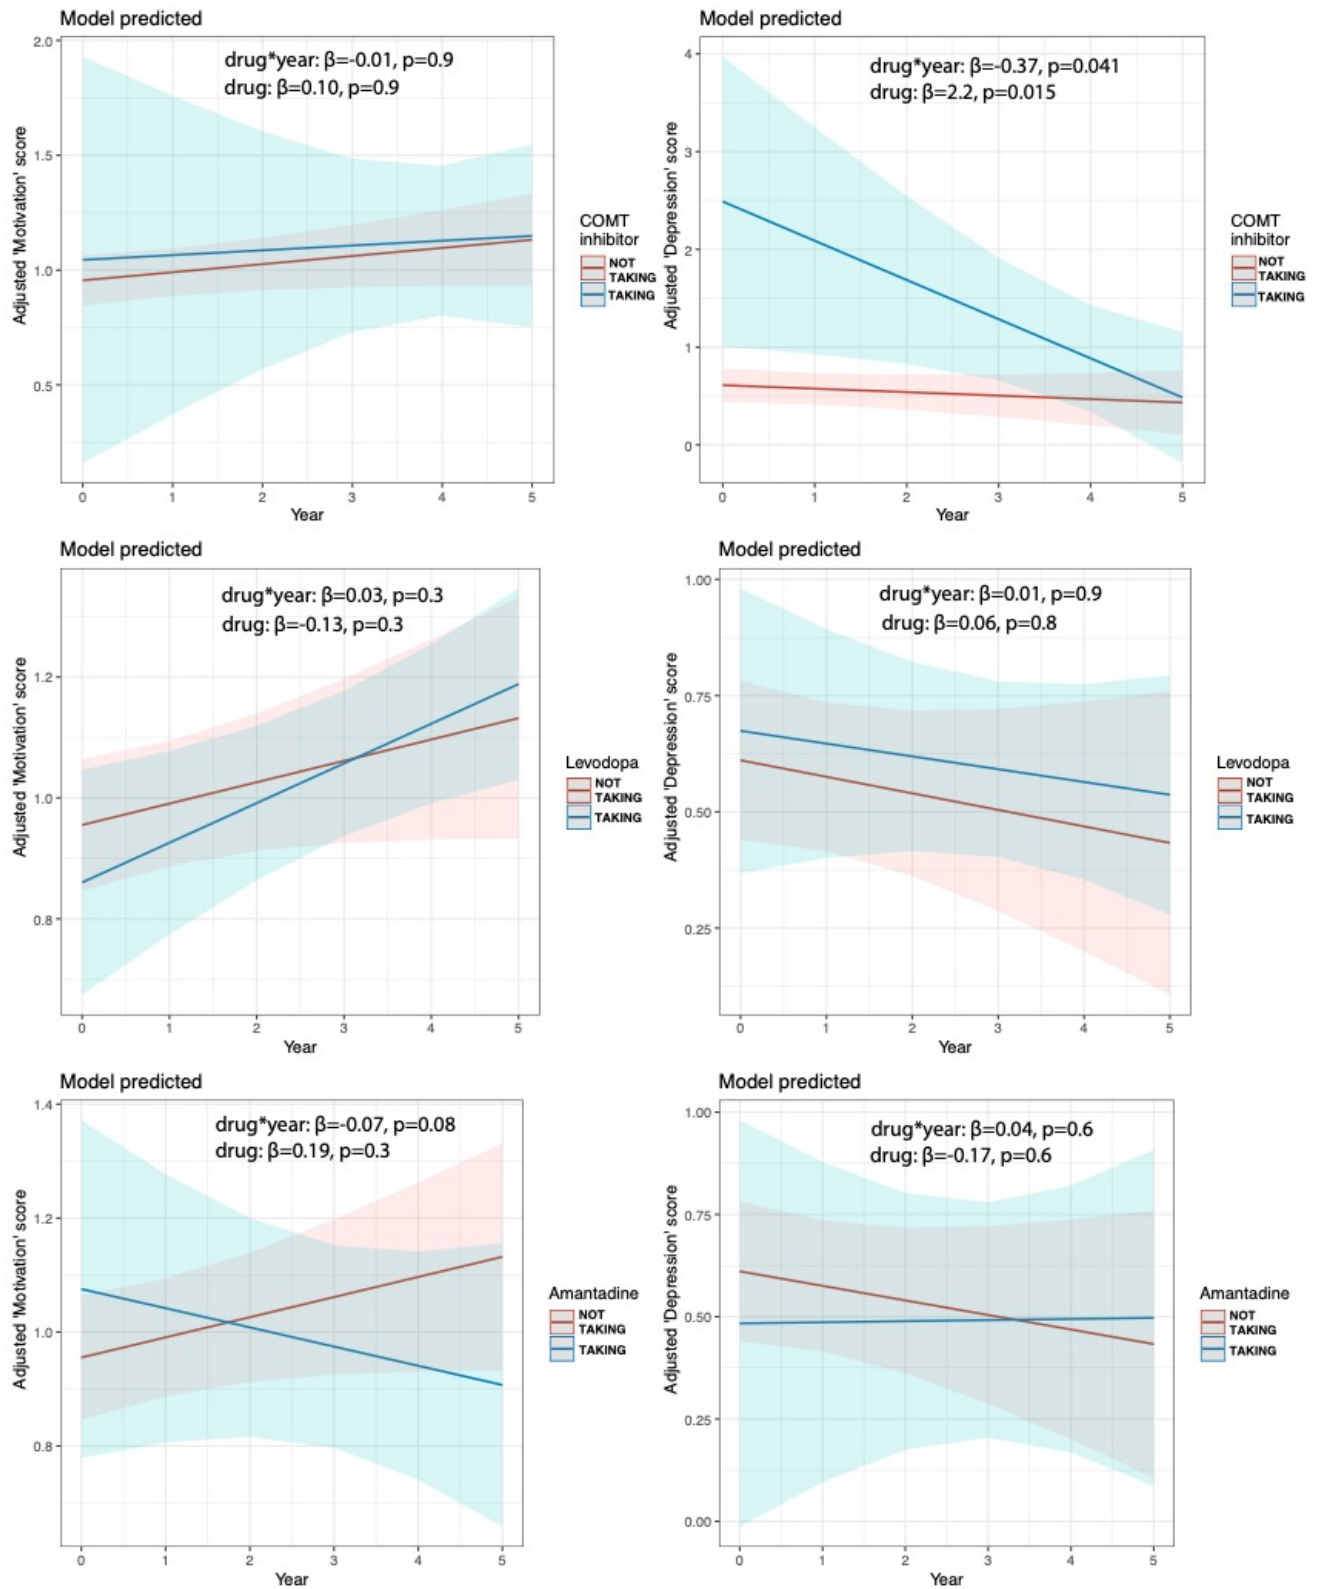

**Supplement figure S1. Top row.** Adjusted model predicted relationship between COMT inhibitor treatment and 'motivation' factor score and 'depression' factor score over time. **Middle row.** Adjusted mixed effects model of predicted relationship between levodopa treatment and 'motivation' factor score and 'depression' factor score over time. **Bottom row.** Adjusted model predicted relationship between amantadine treatment and 'motivation' factor score and 'depression' factor score over time.
